# Supplementary material for: Activation of AMP-Activated Protein Kinase Inhibits Oxidized LDL-Triggered Endoplasmic Reticulum Stress In Vivo
Source: PubMed Central journal article supplement — Diabetes. 2010 Mar 18;59(6):1386–96. doi: 10.2337/db09-1637 (PMC2874699; doi:10.2337/db09-1637), 2010-03-18

## ONLINE APPENDIX

### **Activation of AMP-activated Protein Kinase Inhibits oxidized Low Density Lipoprotein-triggered Endoplasmic Reticulum (ER) Stress and Endothelium Dysfunction *in vivo***

Yunzhou Dong<sup>1,3</sup>, Miao Zhang<sup>1,3</sup>, Shuangxi Wang<sup>1</sup>, Bin Liang<sup>1</sup>, Zhengxing Zhao<sup>1</sup>, Chao Liu<sup>1</sup>,  
Mingyuan Wu<sup>1</sup>, Hyoung Chul Choi<sup>2</sup>, Timothy J. Lyons<sup>1</sup>, Ming-Hui Zou<sup>1\*</sup>

<sup>1</sup>Section of Endocrinology and Diabetes, University of Oklahoma Health Sciences Center, Oklahoma City, OK 73104, USA; <sup>2</sup>Department of Pharmacology, College of Medicine, Yeungnam University, Korea

**Supplemental Figure 1**

**Intracellular calcium mobilizers induce ER stress in a calcium dependent manner in BAEC.** (A) ER stress was induced in BAEC cells with treatment of calcimycin (5  $\mu$ M), tunicamycin (10 $\mu$ g/ml) or meflouquin (5  $\mu$ M) for 30min respectively; (B) BAEC were treated by SIN-1 (1mM) for 30 min. (C) intracellular mobilizers caused ER stress were attenuated by pretreatment of BAEC with BAPTA-AM (10  $\mu$ M);  $n \geq 3$  for each experiment.

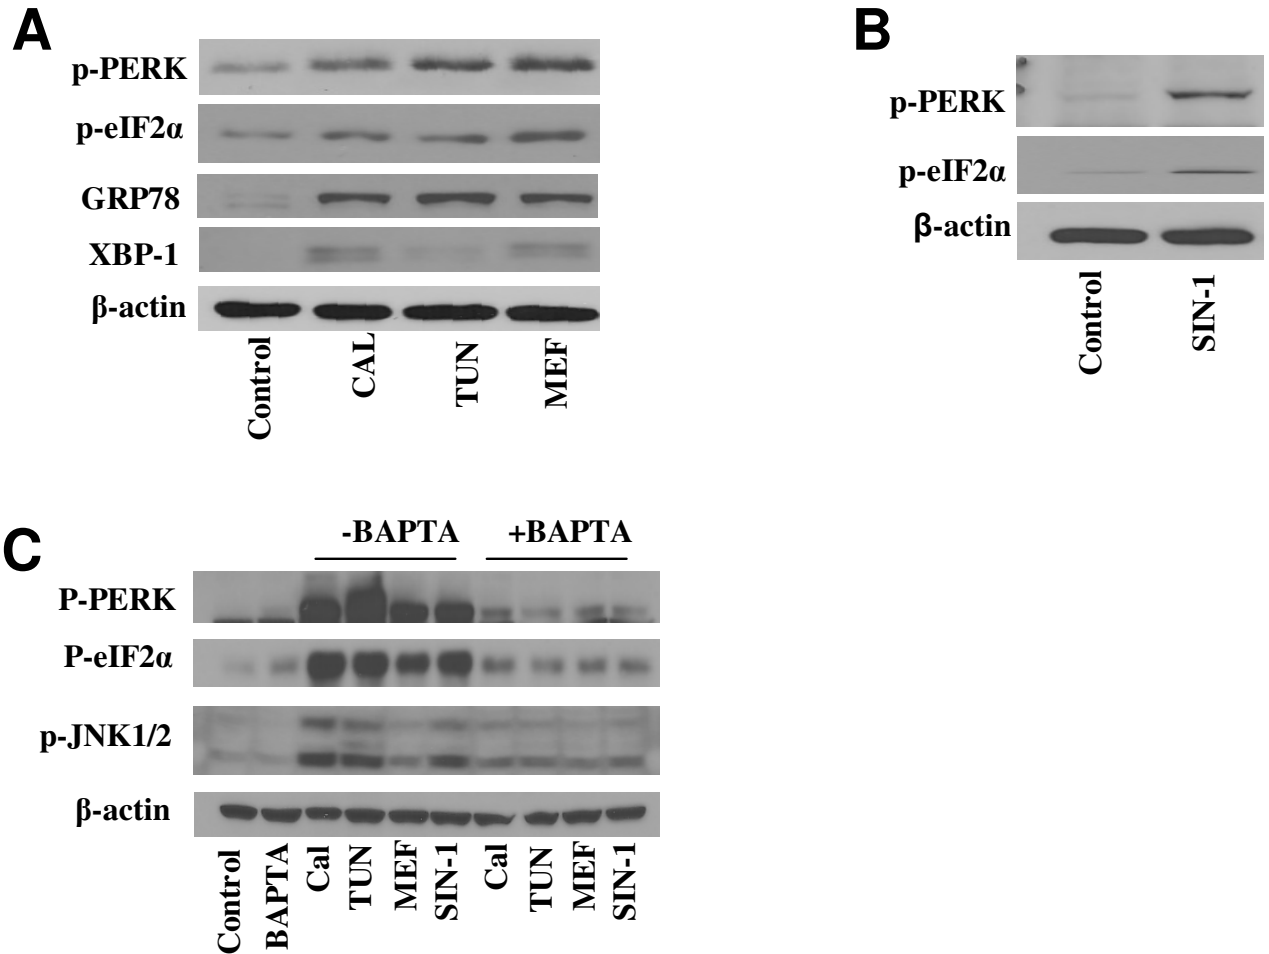

## Supplemental Figure 2

### Decrease in SERCA activity/expression contributed to HOG-LDL induced ER stress.

(A & B) Dose- and time- dependent effects of thapsigargin on ER stress in BAEC. The blot is a representative of at least three blots from three independent experiments; (C & D) Gene silencing of SERCA2 augmented HOG-LDL-triggered ER stress in HUVEC. n=6, \*P<0.05, control siRNA vs SERCA siRNA; #P<0.05, control siRNA vs. control siRNA plus HOG-LDL; †P<0.05, SERCA-specific siRNA plus HOG-LDL vs. control siRNA plus HOG-LDL.

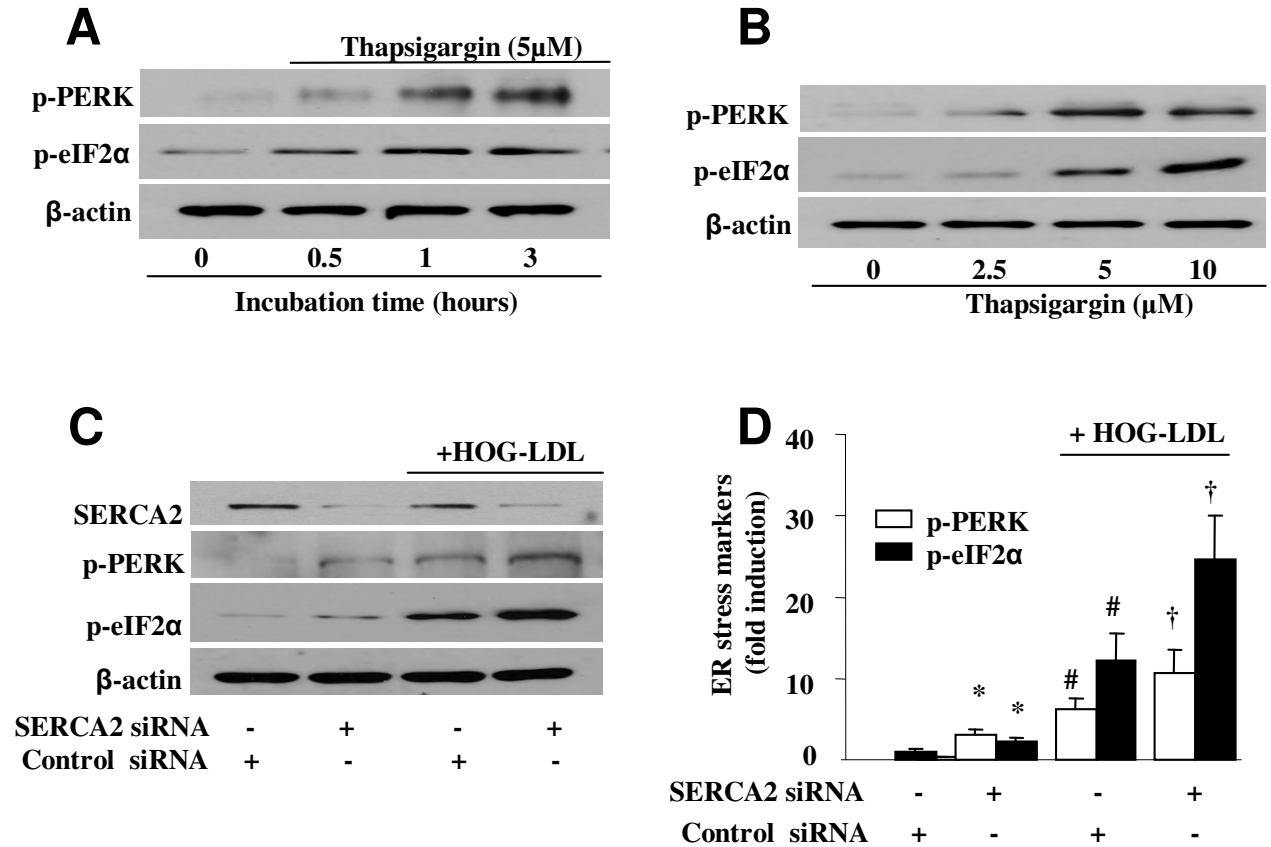

### Supplemental Figure 3

#### Effects of Tempol on HOG-LDL-induced ER stress and SERCA oxidation in cultured human umbilical vein endothelial cells (HUVEC)

(A) HOG-LDL-induced ER stress in HUVEC. HUVEC were exposed to different concentrations of HOG-LDL (50-200  $\mu\text{g/ml}$ ) for 6 h. After the incubation, the cells were lysed and ER stress makers were detected with specific antibodies in western blots. The blot is a representative of three blots from three individual experiments; (B) ER stress in thapsigargin-treated HUVEC. HUVEC were exposed to thapsigargin (5 $\mu\text{M}$ ) for 2 h. ER stress was monitored as described above. (C) Tempol ablates HOG-LDL-induced SERCA oxidation and SERCA activity. \* $p < 0.05$ , HOG-LDL vs. N-LDL; † $p < 0.05$ , HOG-LDL + Tempol vs. HOG-LDL alone;  $n = 3$ . (D) HOG-LDL induced ER stress can be prevented by Tempol supplement. \* $p < 0.05$ , HOG-LDL vs. controls; † $p < 0.05$ , HOG-LDL + Tempol vs. HOG-LDL alone;  $n = 3$ .

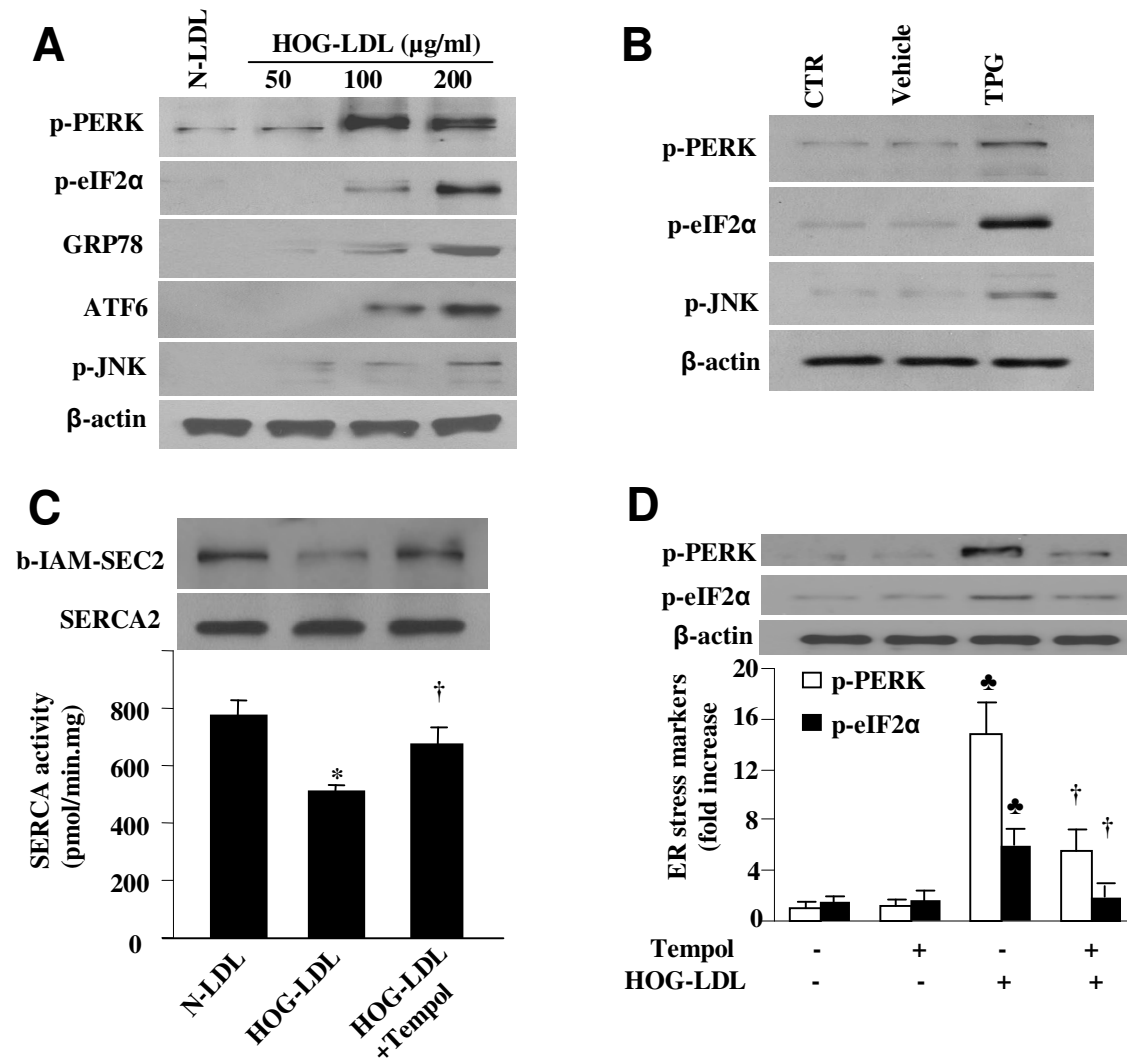

**Supplemental Figure 4**

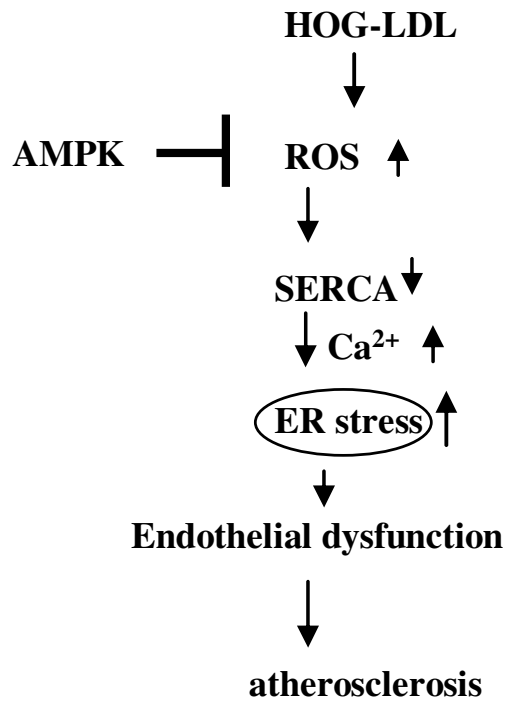

Supplement: supp_db09-1637_onlineappendix.pdf [file supp_db09-1637_onlineappendix.pdf]
